# Supplementary material for: Circular RNA hsa_circ_0003141 promotes tumorigenesis of hepatocellular carcinoma via a miR-1827/UBAP2 axis
Source: publisher site journal article supplement (doi:10.18632/aging.103244), 2020-05-28
Supplement: Supplementary file [file aging-v12i10-103244-supplementary-material-SD1.pdf]

**SUPPLEMENTARY FIGURES**

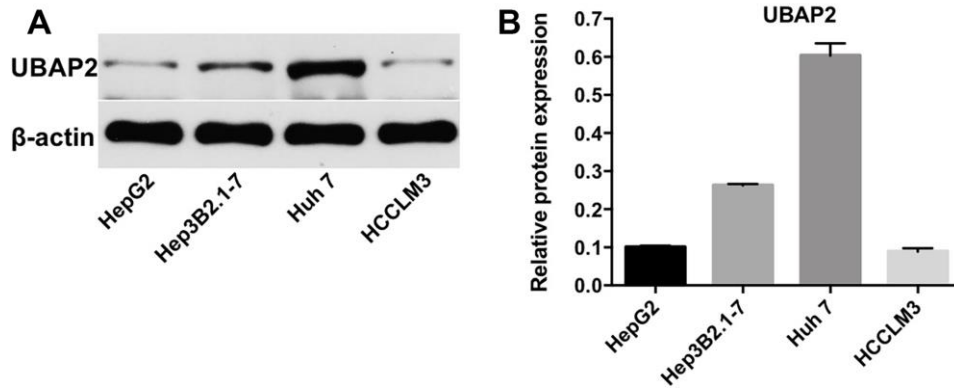

**Supplementary Figure 1. Relative UBAP2 expression in HCC cells.** (A, B) Western analysis of UBAP2 in HepG2, Hep3B2.1-7, Huh-7 and HCCLM3 cells. The relative expression of UBAP2 in HepG2, Hep3B2.1-7, Huh-7 and HCCLM3 cells normalized to β-actin.

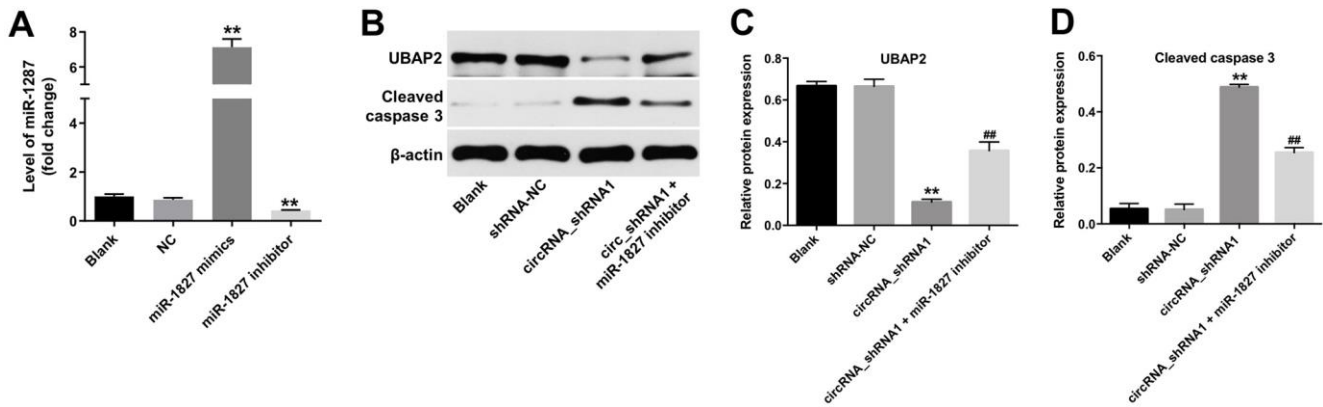

**Supplementary Figure 2. Hsa\_circ\_0003141 functions as oncogene in Hep3B2.1-7 cells by sponging miR-1827, and thus increasing UBAP2 expression.** (A) The level of miR-1827 in Hep3B2.1-7 cells transfected with miR-1827 mimics or miR-1827 inhibitor analyzed by qRT-PCR. \*\*P < 0.01, compared with the NC group. (B) Western analysis of UBAP2 and cleaved caspase 3 in Hep3B2.1-7 cells transfected with hsa\_circ\_0003141-shRNA1 with and without miR-1827 inhibitor. (C, D) The relative expression of UBAP2 and cleaved caspase 3 in Hep3B2.1-7 cells normalized to β-actin. \*\*P < 0.01, compared with the shRNA-NC group. ##P < 0.01, compared with the circRNA\_shRNA1 group.
